# Supplementary material for: Relative impact of residual cytogenetic abnormalities and flow cytometric measurable residual disease on outcome after allogeneic hematopoietic cell transplantation in adult acute myeloid leukemia
Source: PubMed Central journal article supplement — Haematologica. 2022 Aug 4;108(2):420–32. doi: 10.3324/haematol.2022.281585 (PMC9890022; doi:10.3324/haematol.2022.281585), 2022-08-04
Supplement: 2022_281585_ORVAIN_SUPPL.pdf [file 2022_281585_ORVAIN_SUPPL.pdf]

# Relative impact of residual cytogenetic abnormalities and flow cytometric measurable residual disease on outcome after allogeneic hematopoietic cell transplantation in adult acute myeloid leukemia

Corentin Orvain,<sup>1,2,3,4,5</sup> Jacob A. Wilson,<sup>6</sup> Min Fang,<sup>1,7</sup> Brenda M. Sandmaier,<sup>1,2</sup> Eduardo Rodríguez-Arbolí,<sup>1,8</sup> Brent L. Wood,<sup>9</sup> Megan Othus,<sup>10</sup> Frederick R. Appelbaum<sup>1,2</sup> and Roland B. Walter<sup>1,2,7,11</sup>

<sup>1</sup>Clinical Research Division, Fred Hutchinson Cancer Center, Seattle, WA, USA; <sup>2</sup>Department of Medicine, Division of Hematology/Oncology, University of Washington, Seattle, WA, USA; <sup>3</sup>Maladies du Sang, CHU d'Angers, Angers, France; <sup>4</sup>Fédération Hospitalo-Universitaire Grand-Ouest Acute Leukemia, FHU-GOAL, Angers, France; <sup>5</sup>Université d'Angers, INSERM UMR 1307, CNRS UMR 6075, Nantes Université, CRCI2NA, Angers; <sup>6</sup>Cytogenetics Laboratory, Fred Hutchinson Cancer Center, Seattle, WA, USA; <sup>7</sup>Department of Laboratory Medicine and Pathology, University of Washington, Seattle, WA, USA; <sup>8</sup>Department of Hematology, Hospital Universitario Virgen del Rocío, Instituto de Biomedicina de Sevilla (IBIS/CSIC/CIBERONC), University of Seville, Seville, Spain; <sup>9</sup>Department of Pathology and Laboratory Medicine, Children's Hospital, Los Angeles, CA, USA; <sup>10</sup>Public Health Sciences Division, Fred Hutchinson Cancer Center, Seattle, WA, USA and <sup>11</sup>Department of Epidemiology, University of Washington, Seattle, WA, USA.

**Correspondence:** R.B. Walter  
[rwalter@fredhutch.org](mailto:rwalter@fredhutch.org)

**Received:** June 14, 2022.

**Accepted:** July 25, 2022.

**Prepublished:** August 4, 2022.

<https://doi.org/10.3324/haematol.2022.281585>

©2023 Ferrata Storti Foundation

Published under a CC-BY-NC license

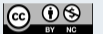

## SUPPLEMENTAL INFORMATION

**SUPPLEMENTAL TABLE 1.** Details regarding cytogenetic and FISH studies in the 506 patients included in the analysis and according to abnormal and normal results pre-HCT.

|                                  | <b>All patients<br/>(n=506)</b> | <b>Abnormal at HCT<br/>(n=119)</b> | <b>Normal at HCT<br/>(n=387)</b> |
|----------------------------------|---------------------------------|------------------------------------|----------------------------------|
| <b>≥ 20 metaphases</b>           | 480 (95%)                       | 106 (89%)                          | 374 (97%)                        |
| Normal karyotype/Normal FISH     | 262 (52%)                       | 0                                  | 262 (68%)                        |
| Abnormal karyotype/Normal FISH   | 30 (6%)                         | 30 (25%)                           | 0                                |
| Normal karyotype/Abnormal FISH   | 0                               | 0                                  | 0                                |
| Abnormal karyotype/Abnormal FISH | 55 (11%)                        | 55 (46%)                           | 0                                |
| FISH not done                    | 133 (26%)                       | 21 (18%)                           | 112 (29%)                        |
| <b>10 - 20 metaphases</b>        | 17 (3%)                         | 9 (8%)                             | 8 (2%)                           |
| Normal karyotype/Normal FISH     | 4 (1%)                          | 0                                  | 4 (1%)                           |
| Abnormal karyotype/Normal FISH   | 2                               | 2 (2%)                             | 0                                |
| Normal karyotype/Abnormal FISH   | 0                               | 0                                  | 0                                |
| Abnormal karyotype/Abnormal FISH | 5 (1%)                          | 5 (4%)                             | 0                                |
| FISH not done                    | 6 (1%)                          | 2 (2%)                             | 4 (1%)                           |
| <b>3 - 10 metaphases</b>         | 9 (2%)                          | 4 (3%)                             | 5 (1%)                           |
| Normal karyotype/Normal FISH     | 5 (1%)                          |                                    | 5 (1%)                           |
| Abnormal karyotype/Normal FISH   | 0                               | 0                                  | 0                                |
| Normal karyotype/Abnormal FISH   | 0                               | 0                                  | 0                                |
| Abnormal karyotype/Abnormal FISH | 3 (1%)                          | 3 (2%)                             | 0                                |
| FISH not done                    | 1                               | 1 (1%)                             | 0                                |

Abbreviations: HCT, hematopoietic cell transplantation.

**SUPPLEMENTAL TABLE 2.** Details regarding molecular studies in the 506 patients included in the analysis, stratified by cytogenetics and MFC status before HCT

|                                                    | <b>Abnormal<br/>Cytogenetics<br/>at Diagnosis<br/>(n=506)</b> | <b>Cyto N<br/>MFC-<br/>(n=327)</b> | <b>Cyto AbN<br/>MFC- (n=63)</b> | <b>Cyto N<br/>MFC+<br/>(n=60)</b> | <b>Cyto AbN<br/>MFC+<br/>(n=56)</b> |
|----------------------------------------------------|---------------------------------------------------------------|------------------------------------|---------------------------------|-----------------------------------|-------------------------------------|
| <b>Cytogenetic/molecular risk (ELN2017), n (%)</b> |                                                               |                                    |                                 |                                   |                                     |
| Favorable                                          | 69 (14%)                                                      | 54 (17%)                           | 8 (13%)                         | 3 (5%)                            | 4 (7%)                              |
| Intermediate                                       | 193 (38%)                                                     | 141<br>(43%)                       | 20 (32%)                        | 18 (30%)                          | 14 (25%)                            |
| Adverse                                            | 244 (48%)                                                     | 132<br>(40%)                       | 35 (56%)                        | 39 (65%)                          | 38 (68%)                            |
| <b>FLT3-ITD mutation, n (%)</b>                    | 59 (12%)                                                      | 51 (16%)                           | 4 (6%)                          | 1 (2%)                            | 3 (5%)                              |
| <i>Missing</i>                                     | 200                                                           | 127                                | 19                              | 29                                | 25                                  |
| <b>FLT3-ITD mutation, n (%)</b>                    | 10 (2%)                                                       | 7 (2%)                             | 1 (2%)                          | 1 (2%)                            | 1 (2%)                              |
| <i>Missing</i>                                     | 341                                                           | 221                                | 37                              | 44                                | 39                                  |
| <b>NPM1 mutation, n (%)</b>                        | 24 (5%)                                                       | 18 (6%)                            | 6 (10%)                         | 0                                 | 0                                   |
| <i>Missing</i>                                     | 221                                                           | 141                                | 20                              | 35                                | 25                                  |
| <b>CEBPA double mutation, n (%)</b>                | 9 (2%)                                                        | 7 (2%)                             | 1 (2%)                          | 1 (2%)                            | 0                                   |
| <i>Missing</i>                                     | 284                                                           | 185                                | 26                              | 43                                | 30                                  |

**SUPPLEMENTAL TABLE 3.** Characteristics of cytogenetic abnormalities in patients with abnormal pre-HCT cytogenetics with and without positive MFC.

|                                                | <b>Cyto AbN/MFC-<br/>(n=63)</b> | <b>Cyto AbN/MFC+<br/>(n=56)</b> | <b>P</b> |
|------------------------------------------------|---------------------------------|---------------------------------|----------|
| <b>Proportion of abnormal metaphases (IQR)</b> | 29% (12 - 62%)                  | 15% (10 - 36%)                  | 0.068    |
| <b>Cytogenetic abnormalities, n (%)</b>        |                                 |                                 |          |
| del(20q)                                       | 5 (8%)                          | 3 (5%)                          | 0.72     |
| Trisomy 8                                      | 3 (5%)                          | 4 (7%)                          | 0.71     |
| CBF                                            | 2 (3%)                          | 3 (5%)                          | 0.67     |
| <i>DEK-NUP214</i>                              | 1 (2%)                          | 0                               | >0.9     |
| MLL                                            | 4 (6%)                          | 5 (9%)                          | 0.73     |
| <i>MECOM</i>                                   | 1 (2%)                          | 2 (4%)                          | 0.60     |
| Chromosome 5 abnormality                       | 5 (8%)                          | 1 (2%)                          | 0.21     |
| Chromosome 7 abnormality                       | 2 (3%)                          | 9 (16%)                         | 0.024    |
| Complex non-monosomal                          | 5 (8%)                          | 6 (11%)                         | 0.75     |
| Complex monosomal                              | 4 (6%)                          | 17 (30%)                        | <0.001   |
| Non-adverse                                    | 31 (49%)                        | 8 (14%)                         | <0.001   |
| <b>Type of cytogenetic abnormality, n (%)</b>  |                                 |                                 |          |
| Deletion                                       | 26 (41%)                        | 34 (61%)                        | 0.043    |
| Extra material                                 | 12 (19%)                        | 30 (54%)                        | <0.001   |
| Translocation                                  | 35 (56%)                        | 30 (54%)                        | 0.86     |

Abbreviations: MFC, multiparameter flow cytometry.

**SUPPLEMENTAL FIGURE 1.** Post-HCT outcomes for 506 adults with AML and initial abnormal cytogenetics undergoing allogeneic HCT while in first or second morphologic remission, stratified by pre-HCT cytogenetics. (A) Cumulative incidence of relapse, (B) relapse-free survival, (C) overall survival, and (D) cumulative incidence of non-relapse mortality.

(A)

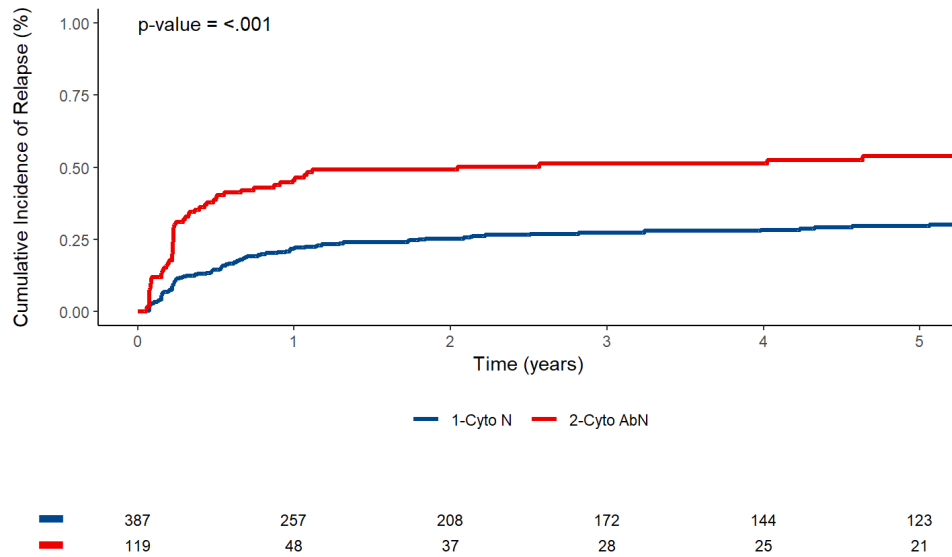

(B)

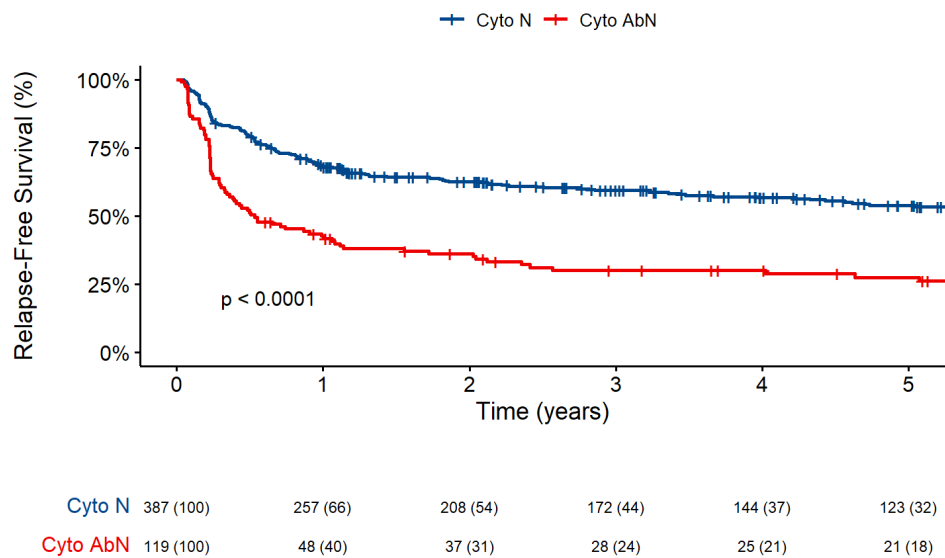

(C)

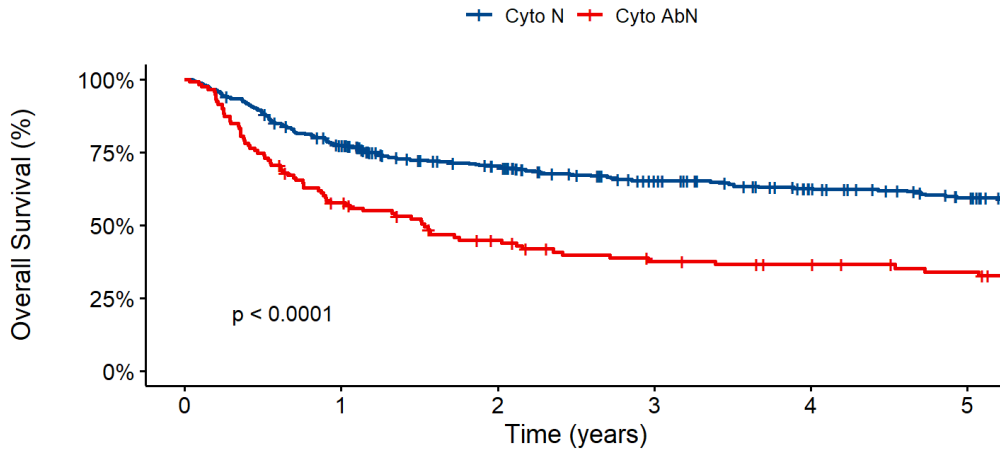

|          |           |          |          |          |          |          |
|----------|-----------|----------|----------|----------|----------|----------|
| Cyto N   | 387 (100) | 292 (75) | 237 (61) | 194 (50) | 165 (43) | 143 (37) |
| Cyto AbN | 119 (100) | 66 (55)  | 46 (39)  | 35 (29)  | 31 (26)  | 26 (22)  |

(D)

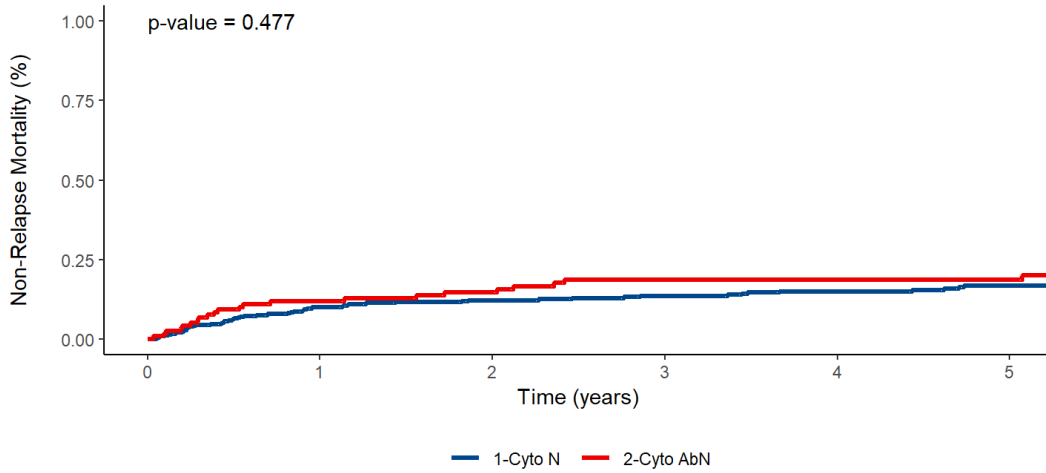

|            |     |     |     |     |     |     |
|------------|-----|-----|-----|-----|-----|-----|
| 1-Cyto N   | 387 | 257 | 208 | 172 | 144 | 123 |
| 2-Cyto AbN | 119 | 48  | 37  | 28  | 25  | 21  |

**SUPPLEMENTAL FIGURE 2.** Post-HCT outcomes for 506 adults with AML and initial abnormal cytogenetics undergoing allogeneic HCT while in first or second morphologic remission, stratified by pre-HCT MFC. (A) Cumulative incidence of relapse, (B) relapse-free survival, (C) overall survival, and (D) cumulative incidence of non-relapse mortality.

(A)

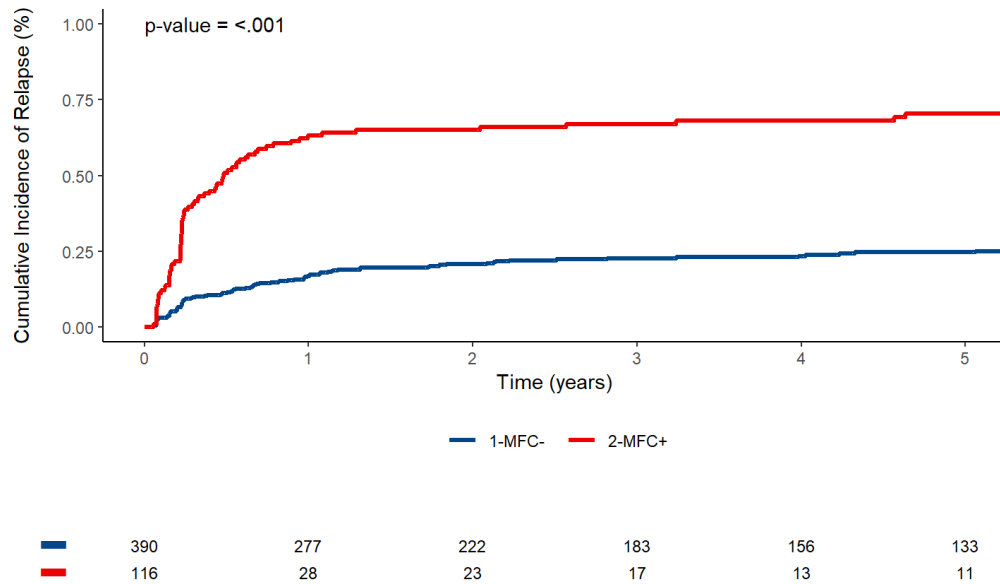

(B)

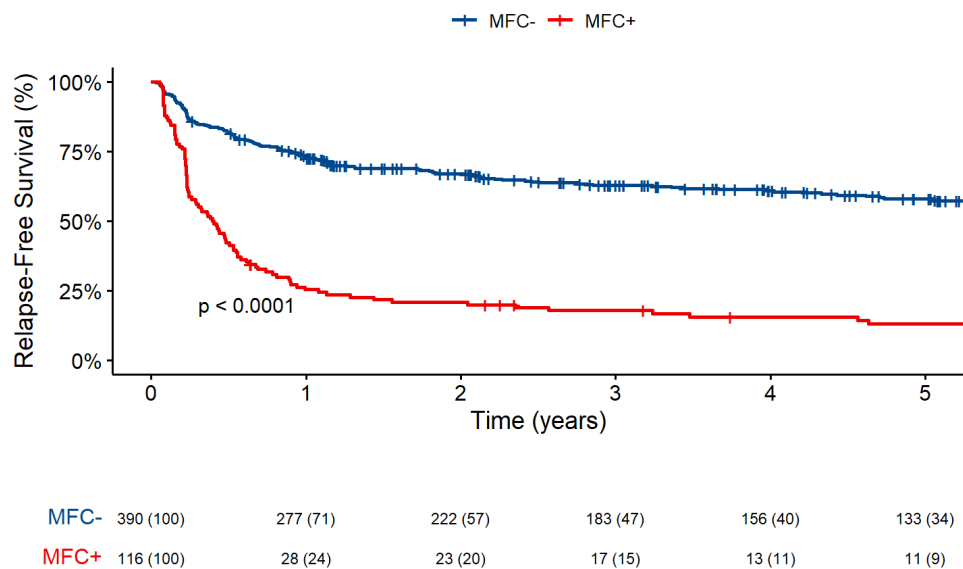

(C)

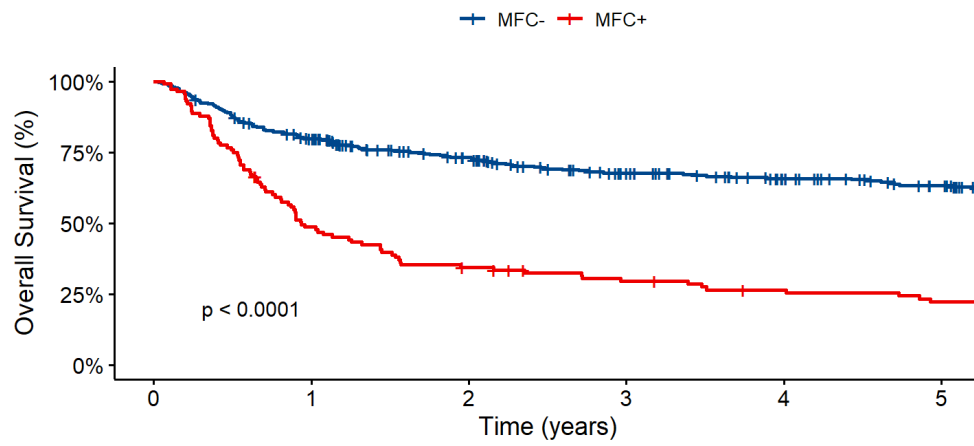

|      |           |          |          |          |          |          |
|------|-----------|----------|----------|----------|----------|----------|
| MFC- | 390 (100) | 303 (78) | 245 (63) | 199 (51) | 171 (44) | 148 (38) |
| MFC+ | 116 (100) | 55 (47)  | 38 (33)  | 30 (26)  | 25 (22)  | 21 (18)  |

(D)

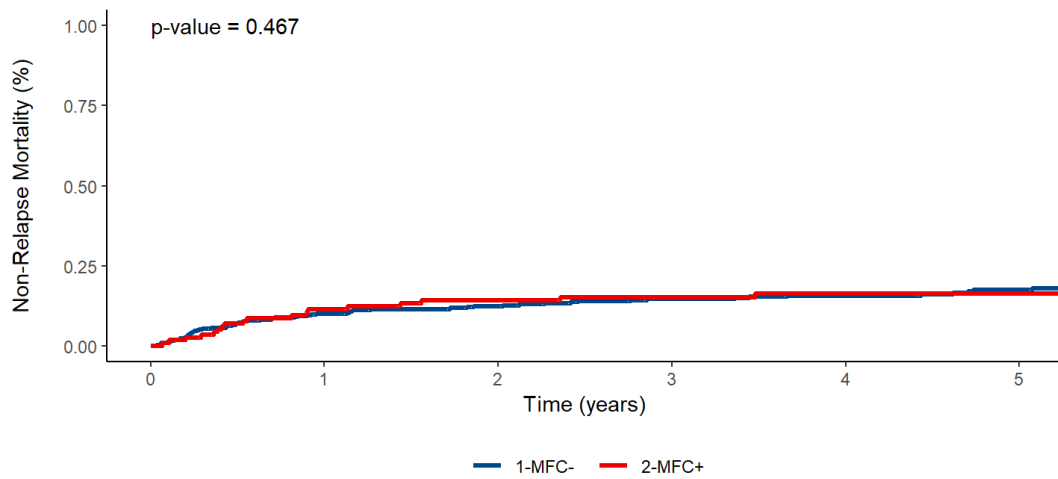

|        |     |     |     |     |     |     |
|--------|-----|-----|-----|-----|-----|-----|
| 1-MFC- | 390 | 277 | 222 | 183 | 156 | 133 |
| 2-MFC+ | 116 | 28  | 23  | 17  | 13  | 11  |
